# Supplementary material
Source: HighWire-hosted journal article supplement (https://fn.bmj.com/content/archdischild-2017-312916)
Supplement: inline-supplementary-material-1 [file inline-supplementary-material-1.docx]

**Supplementary material**

1. **Supplementary Table 1**. Definitions of special educational needs as employed by the included studies.
2. **Supplementary Figure 1.** Forest plot of standardized mean differences in arithmetic between preterm children and full-term controls.
3. **Supplementary Figure 2.** Forest plot of standardized mean differences in reading between preterm children and full-term controls.
4. **Supplementary Figure 3.** Forest plot of standardized mean differences in spelling between preterm children and full-term controls.
5. **Supplementary Figure 4.** Forest plot of the risk ratio for special educational needs between preterm children and full-term controls.
6. **Supplementary Figure 5.** Funnel plot of the standardized mean difference in arithmetic for each study plotted against its standard error.
7. **Supplementary Figure 6.** Funnel plot of the standardized mean difference in reading for each study plotted against its standard error.
8. **Supplementary Figure 7.** Funnel plot of the standardized mean difference in spelling for each study plotted against its standard error.
9. **Supplementary Figure 8.** Funnel plot of the risk ratio for special educational needs for each study plotted against its standard error.

Supplementary Table 1

*Definitions of special educational needs (SEN) as employed by the included studies*

| **Study** | **Definition/specification SEN** |
| --- | --- |
| Luu (2009) | Individualized education program, special classroom, remedial instruction |
| Johnson (2011) | Not further specified |
| McNicholas (2014) | Not further specified |
| Short (2003) | Not further specified |
| Clark (2015) | Remedial support; not further specified |
| Taylor (2011) | Reduced assignments, alternative ways of testing, individual assistance from an adult other than the teacher, different grading criteria, individual teaching or modified instructions, and classroom modifications |
| Litt (2012) | Individualized education program |
| Cheong (2013) | Not further specified |
| Taylor (2016) | Aide support, pull-out remedial education, individualized learning plan, speech therapy provided by the school, special accommodations in the classroom, modified curriculum, guidance counsellor support or additional other supports |

*Supplementary Figure 1*. Forest plot of standardized mean differences in arithmetic between preterm children and full-term controls.

*Supplementary Figure 2.*Forest plot of standardized mean differences in reading between preterm children and full-term controls.

*Supplementary Figure 3.*Forest plot of standardized mean differences in spelling between preterm children and full-term controls.

*Supplementary Figure 4.* Forest plot of the risk ratio for special educational needs between preterm children and full-term controls.

*Supplementary Figure 5.*Funnel plot of the standardized mean difference in arithmetic for each study plotted against its standard error.

*Note.* Egger’s test: *t*(10)=0.40, *p*=0.70

*Supplementary Figure 6.*Funnel plot of the standardized mean difference in reading for each study plotted against its standard error.

*Note.* Egger’s test: *t*(13)=0.66, *p*=.52

*Supplementary Figure 7.*Funnel plot of the standardized mean difference in spelling for each study plotted against its standard error.

*Note.* Egger’s test: *t*(4)=0.78, *p*=.48

*Supplementary Figure 8.*Funnel plot of the risk ratio for special educational needs for each study plotted against its standard error.

*Note.* Egger’s test: *t*(7)=1.63, *p*=.15
